# Supplementary material for: High fat diet modulates the protein content of nutrient transporters in the small intestine of mice: possible involvement of PKA and PKC activity
Source: PubMed Central journal article supplement — Heliyon. 2019 Oct 11;5(10):e02611. doi: 10.1016/j.heliyon.2019.e02611 (PMC6812199; doi:10.1016/j.heliyon.2019.e02611), 2019-10-11

# The full, uncropped blots from Figure 1

Figure 1-A: SGLT1

\* \*

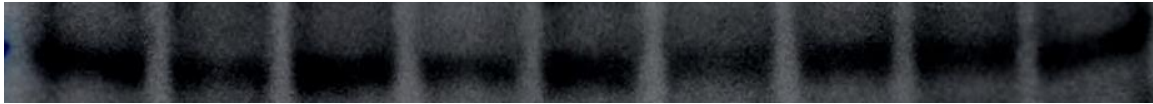

Figure 1-B: GLUT2

\* \*

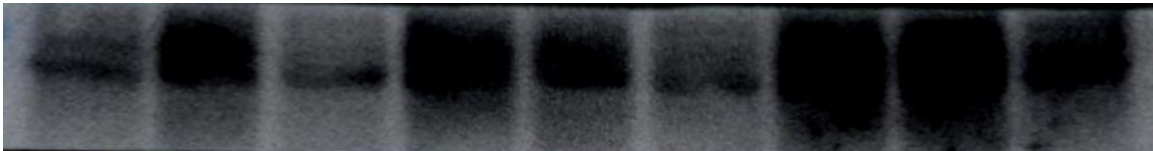

Figure 1-C: GLUT5

\* \*

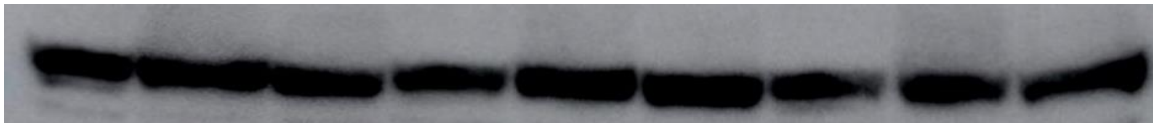

Figure 1-D: PEPT1

\* \*

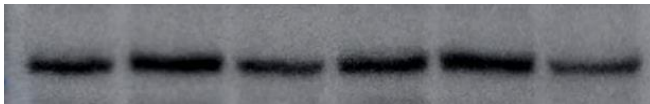

Figure 1-E: NHE3

\* \*

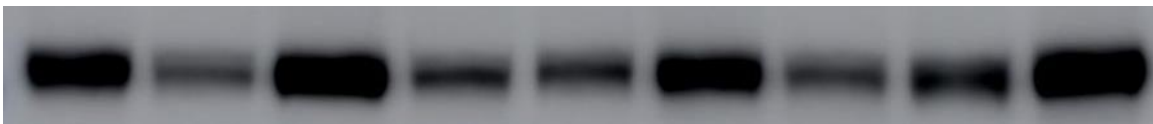

Symbol (\*) indicates the blots cropped for paper

# The full, uncropped blots from Figure 1

Figure 1-F: FATP4

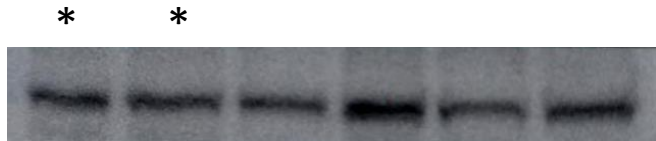

Figure 1-G: NPC1L1

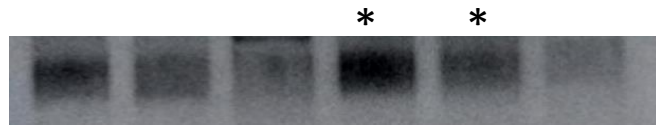

Figure 1-H: CD36

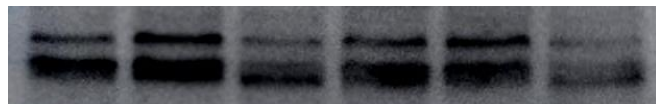

Figure 1-I: MTTP

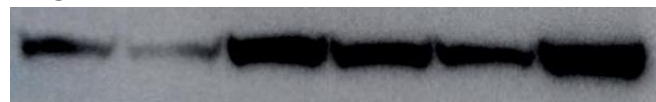

Figure 1-J: L-FABP

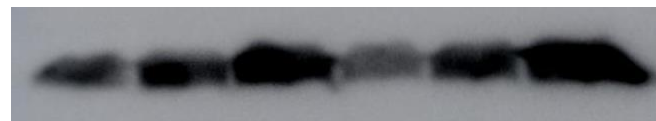

# The full, uncropped blots from Figure 3

Figure 3-A: GLUT2

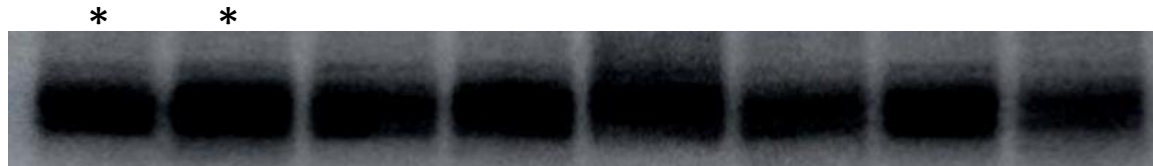

Figure 3-B: PEPT1

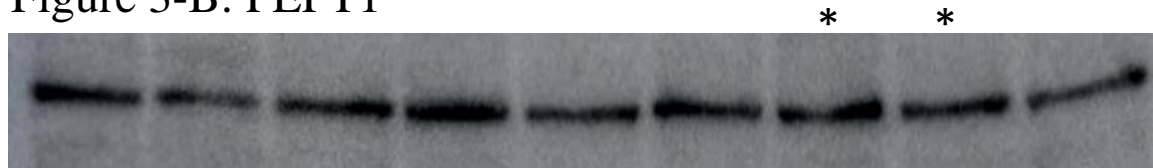

Figure 3-C: NHE3

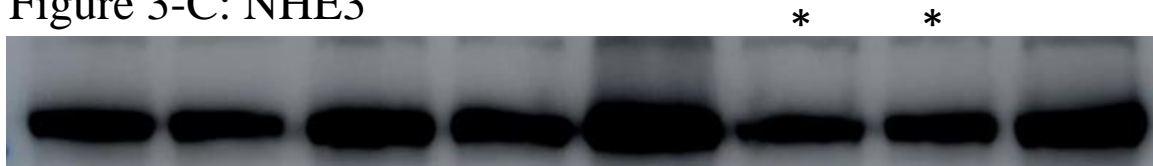

Figure 3-D: CD36

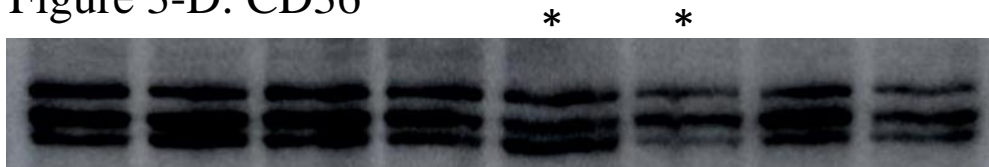

# The full, uncropped blots from Figure 3

Figure 3-E: NPC1L1

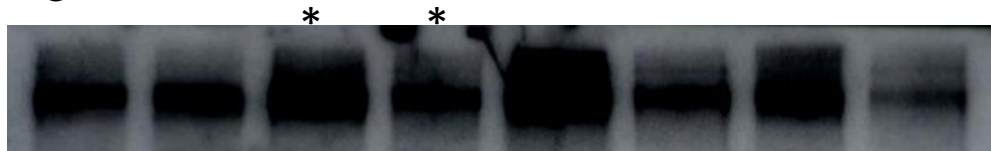

Figure 3-F: MTTP

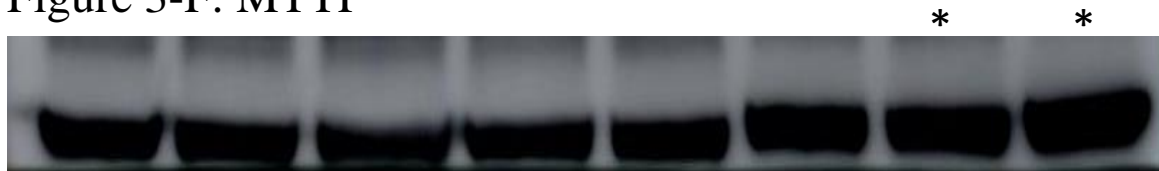

Figure 3-G: L-FABP

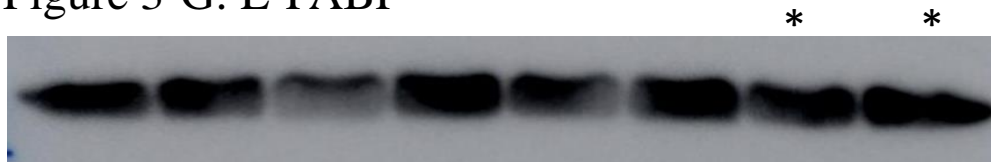

Figure 3-P: CD36

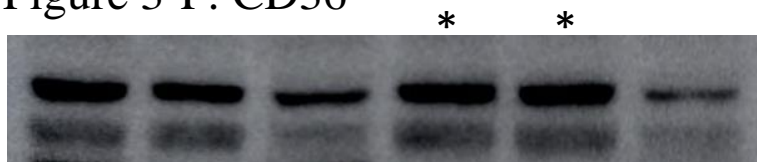

Figure 3-Q: NPC1L1

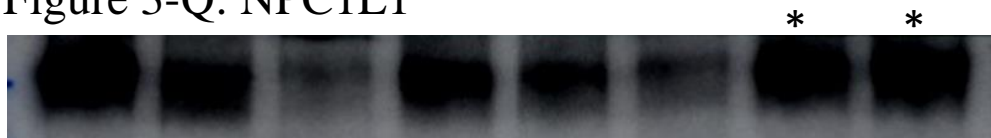

# The full, uncropped blots from Figure 4

Figure 4-A: CREB total

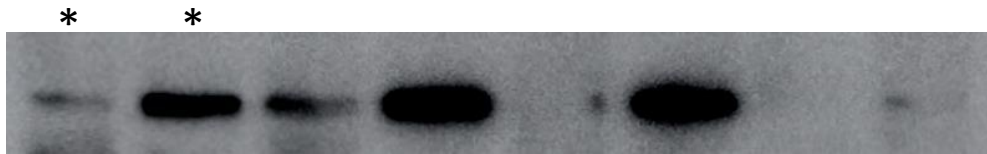

Figure 4-B: pCREB

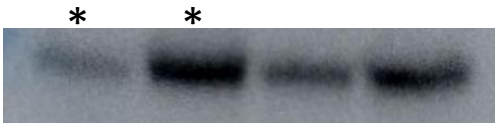

# The full, uncropped blots from Figure 5

Figure 5-A: pCREB

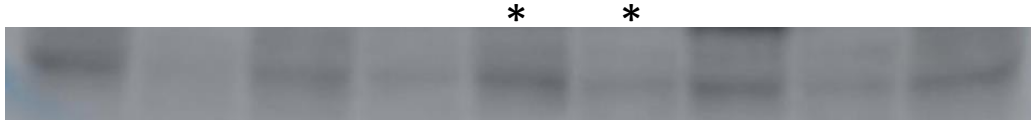

Figure 5-B: GLUT2

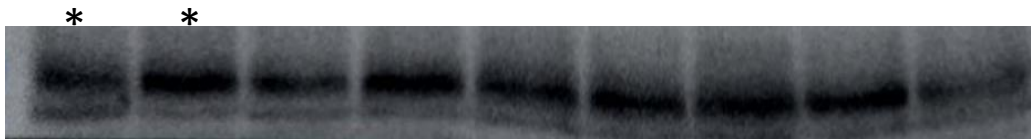

Figure 5-C: PEPT1

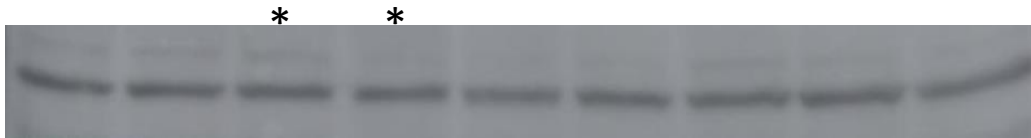

Figure 5-D: NHE3

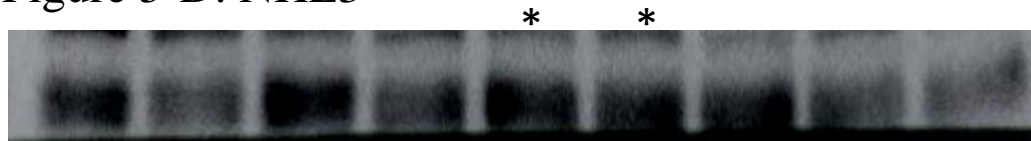

# The full, uncropped blots from Figure 5

Figure 5-E: CD36

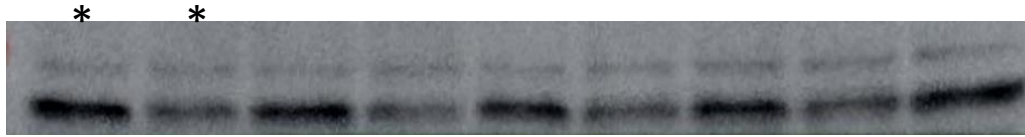

Figure 5-F: NPC1L1

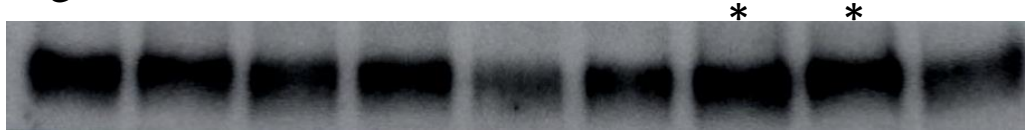

Figure 5-G: MTTP

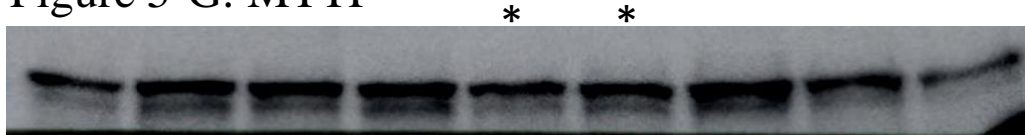

Figure 5-H: L-FABP

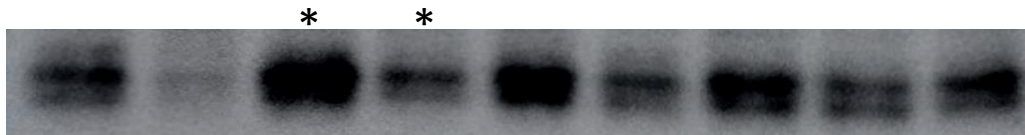

# The full, uncropped blots from Figure 7

Figure 7-B: GLUT2 – 3<sup>a</sup> Week

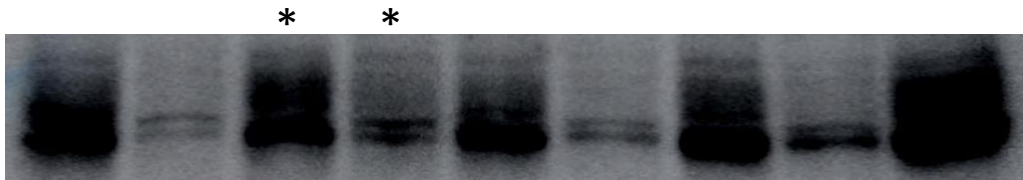

Figure 7-B: GLUT2 – 6<sup>a</sup> Week

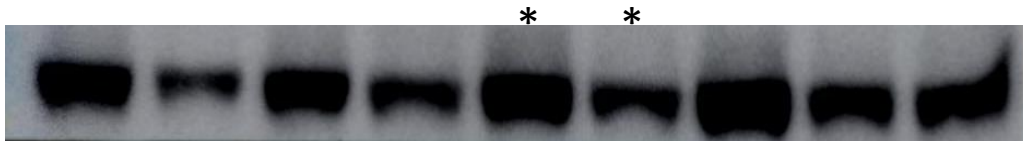

Figure 7-B: GLUT2 – 9<sup>a</sup> Week

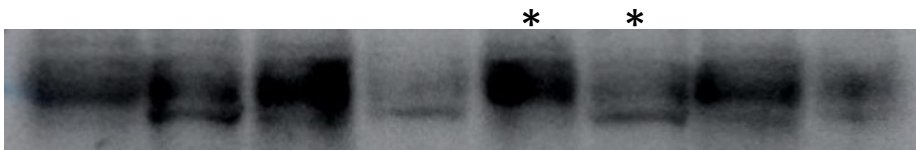



# The full, uncropped blots from Figure 7

Figure 7-C: PEPT1 – 3<sup>a</sup> Week

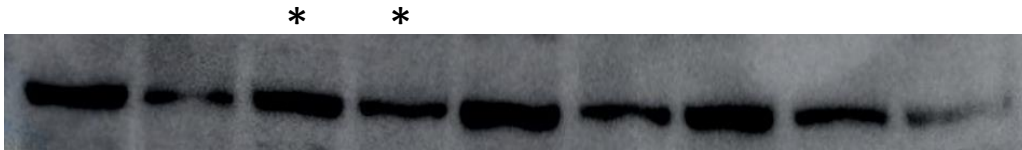

Figure 7-C: PEPT1 – 6<sup>a</sup> Week

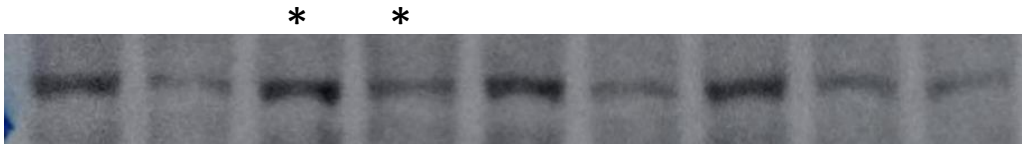

Figure 7-C: PEPT1 – 9<sup>a</sup> Week

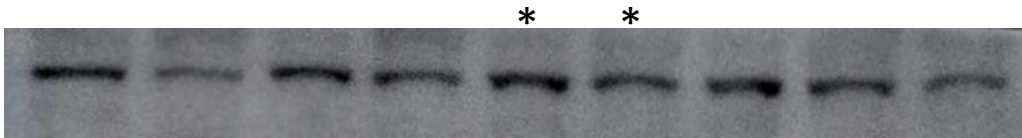

# The full, uncropped blots from Figure 7

Figure 7-D: NHE3 – 3<sup>a</sup> Week

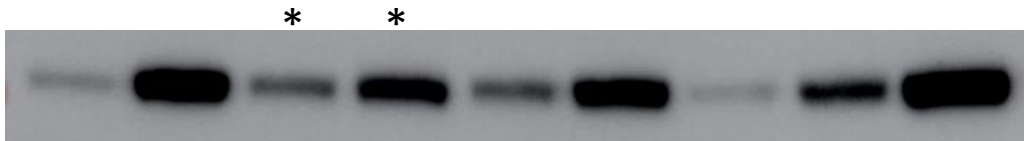

Figure 7-D: NHE3 – 6<sup>a</sup> Week

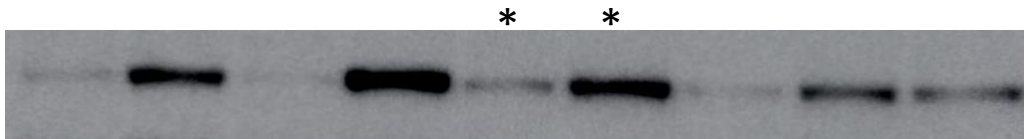

Figure 7-D: NHE3 – 9<sup>a</sup> Week

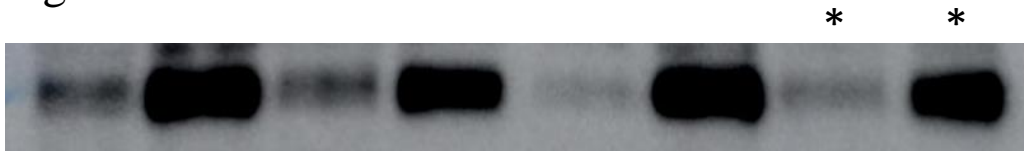

# The full, uncropped blots from Figure 7

Figure 7-E: NPC1L1 – 3<sup>a</sup> Week

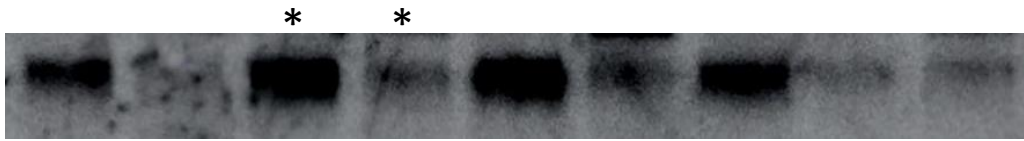

Figure 7-E: NPC1L1 – 6<sup>a</sup> Week

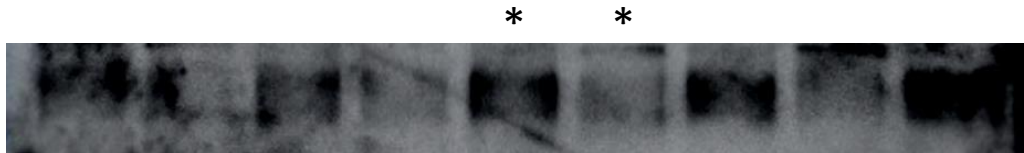

Figure 7-E: NPC1L1 – 9<sup>a</sup> Week

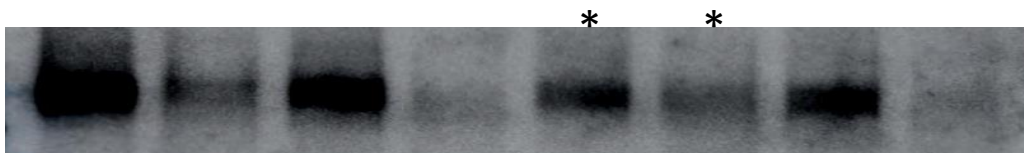

Supplement: mmc1.pdf [file mmc1.pdf]
